# Supplementary material for: Synthesis of Ce co-doped Ag–ZnO photocatalyst with excellent performance for NBB dye degradation under natural sunlight illumination
Source: Royal Society of Chemistry journal article supplement (doi:10.1039/c2cy20254a), 2012-01-01
Supplement: c2cy20254a.pdf [file c2cy20254a.pdf]

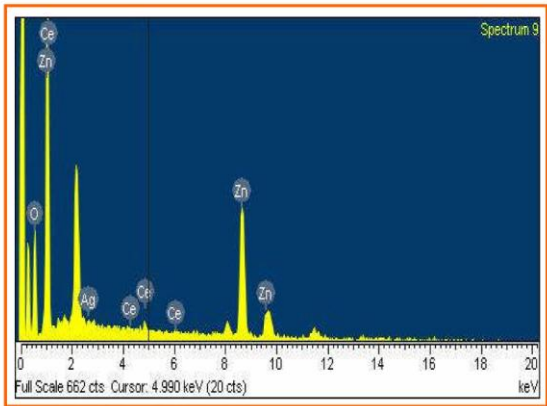

**Fig. S1**

**Fig. S1.** EDS of Ce-Ag-ZnO

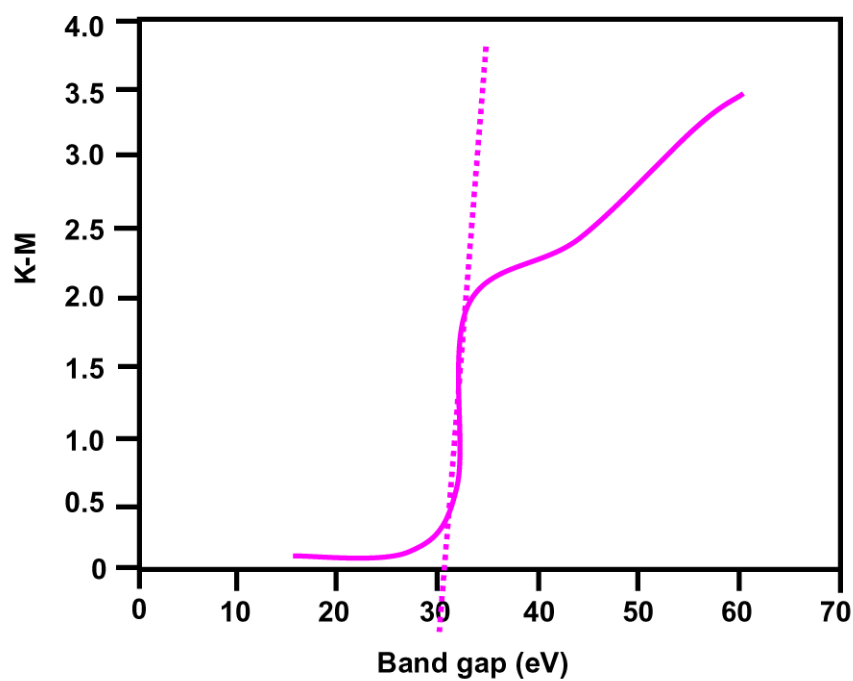

Fig. S2

**Fig. S2.** Plot of transferred Kubelka-Munk versus energy of the light absorbed of the Ce-Ag - ZnO.

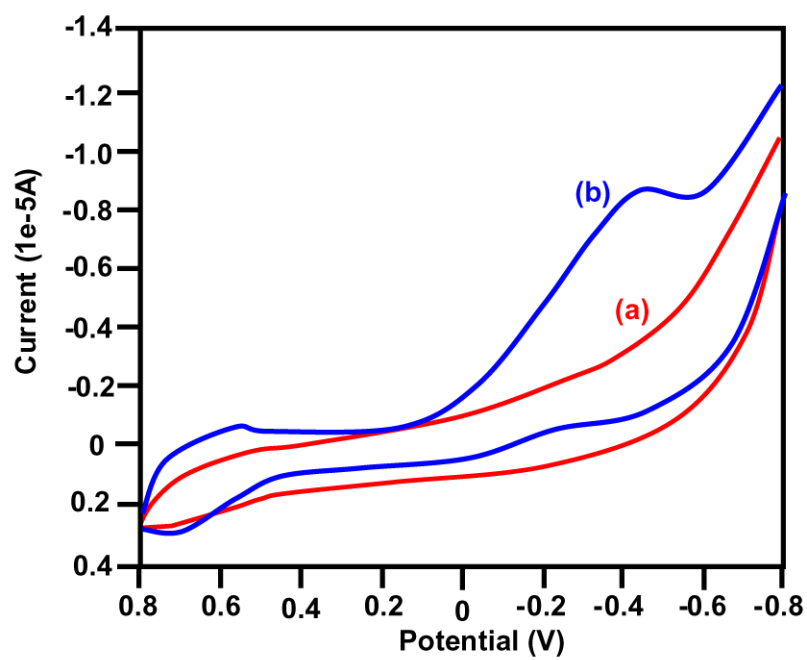

Fig. S3

**Fig. S3.** Cyclic voltammogram of a) bare ZnO and b) Ce-Ag -ZnO
